# Supplementary material
Source: MDPI journal article supplement (https://www.mdpi.com/2077-1312/8/1/52)
Supplement: s1 [file s1]

Supplementary Materials

# UAV Photogrammetry and Ground Surveys as a Mapping Tool for Quickly Monitoring Shoreline and Beach Changes

Antonio Zanutta \*, Alessandro Lambertini and Luca Vittuari

Department of Civil, Chemical, Environmental and Materials Engineering (DICAM), University of Bologna, Viale Risorgimento 2, 40136 Bologna, Italy; alessandro.lambertini@unibo.it (A.L.); luca.vittuari@unibo.it (L.V.)

\* Correspondence: antonio.zanutta@unibo.it; Tel.: +39-051-2093111

Received: 20 December; Accepted: 14 January 2020; Published: January 2020

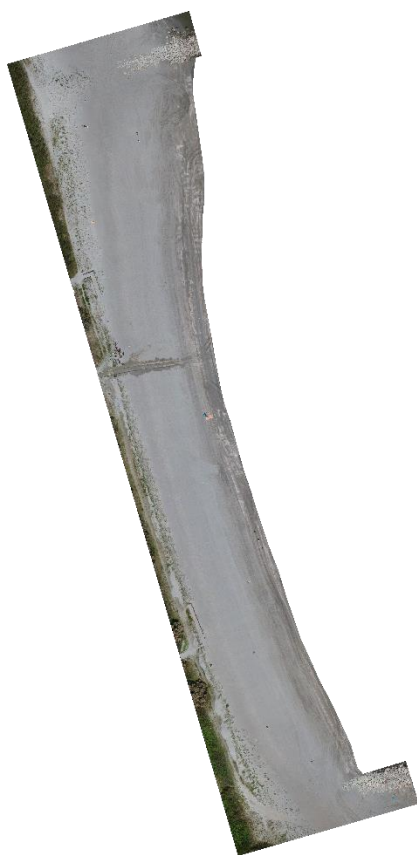

**Figure S1.** Figure S1: 2019 UAV derived Orthophoto.

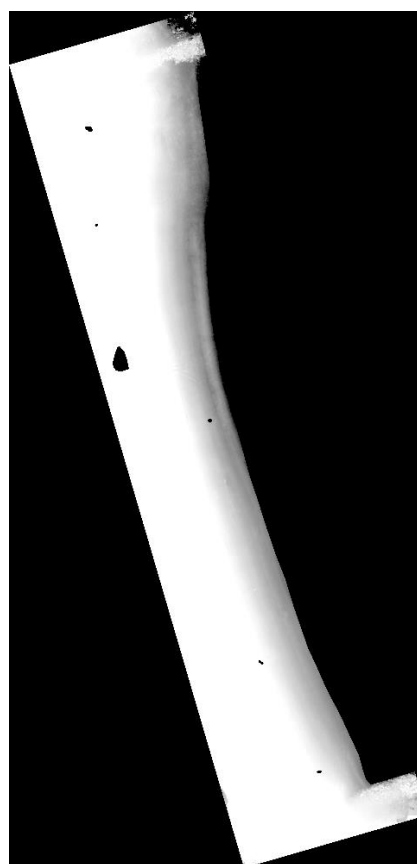

**Figure S2.** DTM, EPSG:25833, GSD:0.05m.
